# Supplementary material
Source: publisher figshare collection journal article supplement (https://frontiersin.figshare.com/ndownloader/files/21888336)
Supplement: Supplementary file 1 [file 21888336]

## Sheet: Blad1
X(East)	Y(North)	Dip	Azimuth	Rock type
metre (UTM zone 28N)	metre (UTM zone 28N)	degree	degree
553464	7.19528e+06	82.255	174.733	Rhyolite
553547	7.19495e+06	66.2885	109.651	Rhyolite
553550	7.19495e+06	66.7364	122.453	Rhyolite
553529	7.19494e+06	52.6531	119.174	Rhyolite
553558	7.19492e+06	80.795	21.5048	Rhyolite
553553	7.19492e+06	74.1117	26.912	Rhyolite
553705	7.1949e+06	85.8906	63.8793	Rhyolite
553706	7.1949e+06	83.853	59.9644	Rhyolite
553731	7.19488e+06	77.6434	47.349	Rhyolite
553731	7.19488e+06	81.0523	215.936	Rhyolite
553759	7.19486e+06	58.2812	34.831	Rhyolite
553761	7.19485e+06	56.7168	12.4343	Rhyolite
553762	7.19485e+06	66.5581	27.8012	Rhyolite
553764	7.19485e+06	60.2792	30.6536	Rhyolite
553769	7.19486e+06	50.946	26.163	Rhyolite
553770	7.19485e+06	72.9186	175.895	Rhyolite
553770	7.19485e+06	72.0393	193.73	Rhyolite
553771	7.19485e+06	70.0268	175.722	Rhyolite
553771	7.19485e+06	67.1896	137.527	Rhyolite
553771	7.19485e+06	37.6358	43.9264	Rhyolite
553769	7.19485e+06	34.9591	12.5054	Rhyolite
553879	7.1949e+06	61.6677	138.402	Rhyolite
553879	7.1949e+06	62.8509	132.008	Rhyolite
553879	7.1949e+06	60.3754	175.077	Rhyolite
553906	7.19489e+06	44.7703	150.789	Rhyolite
553904	7.1949e+06	54.8651	142.415	Rhyolite
554001	7.1949e+06	82.566	218.748	Rhyolite
554000	7.19489e+06	89	221.371	Rhyolite
554001	7.19489e+06	72.0507	173.927	Rhyolite
554001	7.19489e+06	73.1558	166.844	Rhyolite
554000	7.19489e+06	68.2945	195.522	Rhyolite
554000	7.19489e+06	78.3337	237.34	Rhyolite
554000	7.19489e+06	66.9573	212.854	Rhyolite
553971	7.19491e+06	74.4971	87.9687	Rhyolite
553965	7.19491e+06	34.2252	92.172	Rhyolite
553965	7.19491e+06	41.1373	132.104	Rhyolite
554037	7.19495e+06	31.1527	109.732	Rhyolite
554038	7.19495e+06	29.9505	99.2802	Rhyolite
554043	7.19495e+06	13.5522	53.9513	Rhyolite
554053	7.19494e+06	81.9303	126.244	Rhyolite
554053	7.19494e+06	74.9581	131.803	Rhyolite
553990	7.19519e+06	74.4237	126.489	Rhyolite
553894	7.19524e+06	82.9137	247.922	Rhyolite
553898	7.19524e+06	54.5829	273.541	Rhyolite
553884	7.19515e+06	67.331	328.21	Rhyolite
553884	7.19515e+06	71.7702	332.55	Rhyolite
553875	7.19516e+06	89	179.937	Rhyolite
553875	7.19516e+06	76.0307	175.669	Rhyolite
553875	7.19516e+06	83.4277	171.318	Rhyolite
553875	7.19516e+06	81.1713	174.591	Rhyolite
553863	7.19521e+06	84.1117	239.813	Rhyolite
553862	7.19521e+06	80.6632	235.502	Rhyolite
552545	7.19473e+06	62.9531	12.0554	Rhyolite
552544	7.19473e+06	70.3625	351.614	Rhyolite
553470	7.19472e+06	74.0632	52.6411	Rhyolite
553469	7.19472e+06	72.7582	40.5471	Rhyolite
553578	7.19477e+06	77.8359	68.3454	Rhyolite
553578	7.19477e+06	78.7882	85.4596	Rhyolite
553578	7.19477e+06	89	85.8324	Rhyolite
553578	7.19477e+06	89	59.2917	Rhyolite
553577	7.19477e+06	89	242.302	Rhyolite
553474	7.19476e+06	54.6099	184.265	Rhyolite
553454	7.19478e+06	82.0288	171.745	Rhyolite
553455	7.19478e+06	83.033	163.309	Rhyolite
553433	7.19483e+06	9.55278	24.0499	Rhyolite
553435	7.19483e+06	20.1186	47.2196	Rhyolite
553704	7.19434e+06	76.2408	284.525	Rhyolite
554155	7.19417e+06	17.7602	112.571	Rhyolite
554135	7.19415e+06	35.9083	97.9178	Rhyolite
554033	7.19416e+06	73.404	68.1353	Rhyolite
553460	7.19528e+06	88.2729	147.227	Rhyolite
553592	7.19414e+06	63.4894	222.078	Rhyolite
553592	7.19414e+06	48.384	230.024	Rhyolite
553468	7.19472e+06	86.2006	42.6861	Rhyolite
553461	7.19454e+06	72.4613	193.133	Rhyolite
553409	7.19493e+06	34.6971	64.9294	Rhyolite
553718	7.19416e+06	86.1203	291.762	Rhyolite
553751	7.1941e+06	61.7509	65.0568	Rhyolite
553877	7.19408e+06	57.6775	39.2142	Rhyolite
554070	7.19416e+06	20.3999	147.698	Rhyolite
553702	7.19434e+06	71.4724	323.032	Rhyolite
553461	7.19454e+06	68.3049	194.782	Rhyolite
554026	7.19416e+06	74.2319	334.785	Rhyolite
553703	7.19434e+06	69.2518	284.383	Rhyolite
553592	7.19414e+06	40.5159	217.445	Rhyolite
553416	7.19493e+06	29.4983	280.559	Rhyolite
554024	7.19416e+06	78.2117	314.446	Rhyolite
554154	7.19417e+06	36.5348	111.302	Rhyolite
553705	7.19417e+06	77.8027	61.3398	Rhyolite
553578	7.19476e+06	50.091	85.056	Rhyolite
553750	7.1941e+06	89	229.498	Rhyolite
553409	7.19493e+06	39.2843	65.1974	Rhyolite
553464	7.19449e+06	64.061	219.791	Rhyolite
553578	7.19476e+06	67.9101	90.6925	Rhyolite
554135	7.19415e+06	44.7793	118.147	Rhyolite
554120	7.19415e+06	27.6403	123.988	Rhyolite
553458	7.19453e+06	82.707	119.283	Rhyolite
553891	7.19411e+06	81.2126	164.46	Rhyolite
554033	7.19416e+06	78.1264	77.6313	Rhyolite
553702	7.19434e+06	78.3687	287.644	Rhyolite
553876	7.19408e+06	27.7	44.5106	Rhyolite
554151	7.19417e+06	46.2247	114.691	Rhyolite
553460	7.19528e+06	89	146.19	Rhyolite
553702	7.19434e+06	69.1973	298.29	Rhyolite
554122	7.19415e+06	31.8312	124.464	Rhyolite
554072	7.19417e+06	20.0383	175.78	Rhyolite
554026	7.19416e+06	80.8313	350.19	Rhyolite
554027	7.19416e+06	72.1204	330.307	Rhyolite
553463	7.19449e+06	53.8461	229.546	Rhyolite
553575	7.19477e+06	69.6038	100.07	Rhyolite
553460	7.19528e+06	54.7867	68.9159	Rhyolite
553880	7.19409e+06	75.5444	140.599	Rhyolite
553590	7.19414e+06	55.2186	211.088	Rhyolite
553716	7.19417e+06	83.0419	73.3932	Rhyolite
553460	7.19529e+06	56.8228	46.0202	Rhyolite
554155	7.19417e+06	26.0088	104.003	Rhyolite
554031	7.19416e+06	84.9081	52.5404	Rhyolite
554070	7.19416e+06	31.62	163.257	Rhyolite
554024	7.19416e+06	75.7706	11.115	Rhyolite
553469	7.19472e+06	85.6171	32.6471	Rhyolite
553463	7.19449e+06	60.8126	220.808	Rhyolite
553880	7.19409e+06	73.5231	138.51	Rhyolite
553750	7.1941e+06	85.2459	240.043	Rhyolite
554155	7.19417e+06	43.6597	125.434	Rhyolite
553893	7.19412e+06	74.4667	140.642	Rhyolite
554135	7.19415e+06	30.2104	98.8845	Rhyolite
554153	7.19417e+06	34.6729	121.623	Rhyolite
554155	7.19417e+06	28.8212	126.836	Rhyolite
554024	7.19416e+06	73.3413	355.198	Rhyolite
551835	7.19522e+06	45.0986	213.261	Rhyolite
552128	7.19559e+06	68.2353	125.718	Rhyolite
552165	7.19569e+06	58.9759	136.439	Rhyolite
551850	7.1952e+06	56.4366	37.8743	Rhyolite
551843	7.19522e+06	45.4405	221.532	Rhyolite
552512	7.19553e+06	51.3799	159.957	Rhyolite
552134	7.19559e+06	72.4493	115.05	Rhyolite
552566	7.19567e+06	56.3533	125.145	Rhyolite
552116	7.19556e+06	72.3598	134.183	Rhyolite
552174	7.19569e+06	67.7851	248.746	Rhyolite
552516	7.19554e+06	61.38	172.739	Rhyolite
552181	7.19569e+06	52.5464	236.591	Rhyolite
551850	7.1952e+06	64.9011	358.142	Rhyolite
552166	7.19566e+06	59.5669	250.589	Rhyolite
552510	7.19553e+06	23.3896	86.2582	Rhyolite
551850	7.1952e+06	51.9763	79.0028	Rhyolite
552094	7.19572e+06	68.0843	198.529	Rhyolite
552624	7.19534e+06	50.1101	72.416	Rhyolite
552166	7.1957e+06	75.0263	227.29	Rhyolite
552510	7.19553e+06	19.5407	91.3082	Rhyolite
551850	7.1952e+06	32.7253	209.89	Rhyolite
551850	7.19521e+06	49.93	214.74	Rhyolite
552163	7.19566e+06	58.4922	234.645	Rhyolite
551850	7.1952e+06	51.7923	34.8926	Rhyolite
552616	7.19534e+06	45.0905	114.766	Rhyolite
552163	7.19569e+06	71.3292	245.679	Rhyolite
552566	7.19567e+06	62.1892	153.754	Rhyolite
552148	7.19563e+06	66.8249	106.393	Rhyolite
552149	7.19567e+06	80.012	278.119	Rhyolite
552510	7.19554e+06	20.6549	68.2472	Rhyolite
552624	7.19534e+06	48.2059	78.0465	Rhyolite
551848	7.1952e+06	30.9205	242.401	Rhyolite
552511	7.19554e+06	64.6518	148.922	Rhyolite
552115	7.19556e+06	67.7061	152.071	Rhyolite
552616	7.19534e+06	43.6897	105.721	Rhyolite
552165	7.19569e+06	70.3998	144.381	Rhyolite
551850	7.19521e+06	42.5166	203.492	Rhyolite
551848	7.19521e+06	45.845	216.87	Rhyolite
552512	7.19553e+06	72.0744	147.421	Rhyolite
551847	7.1952e+06	55.6566	60.8775	Rhyolite
552510	7.19554e+06	14.1473	76.4242	Rhyolite
551850	7.1952e+06	57.6434	60.569	Rhyolite
552131	7.19559e+06	64.0602	157.107	Rhyolite
552147	7.19563e+06	64.0154	113.822	Rhyolite
552115	7.19556e+06	67.122	125.876	Rhyolite
551847	7.1952e+06	69.6858	54.6965	Rhyolite
552091	7.19571e+06	59.5687	196.763	Rhyolite
552168	7.19565e+06	59.3602	270.006	Rhyolite
552623	7.19534e+06	53.9087	113.48	Rhyolite
551850	7.1952e+06	29.871	224.729	Rhyolite
552166	7.19566e+06	74.4751	254.38	Rhyolite
552092	7.19571e+06	72.358	179.878	Rhyolite
552566	7.19567e+06	58.9185	137.433	Rhyolite
552167	7.19571e+06	77.6279	218.954	Rhyolite
552566	7.19567e+06	45.8653	125.179	Rhyolite
552623	7.19534e+06	47.2148	106.149	Rhyolite
552111	7.19556e+06	75.7341	110.39	Rhyolite
552206	7.19489e+06	20.4758	254.378	Rhyolite
553128	7.195e+06	41.43	269.107	Rhyolite
552206	7.19489e+06	28.2832	248.615	Rhyolite
552136	7.19513e+06	82.3726	3.67557	Rhyolite
552631	7.19513e+06	69.5228	43.5215	Rhyolite
552949	7.19461e+06	67.5731	40.3055	Rhyolite
552136	7.19513e+06	19.1194	268.801	Rhyolite
552630	7.19512e+06	19.755	66.6708	Rhyolite
552632	7.19513e+06	70.4729	46.2961	Rhyolite
552949	7.19461e+06	63.3647	48.9188	Rhyolite
552710	7.19468e+06	73.797	359.58	Rhyolite
552967	7.1946e+06	70.7766	114.57	Rhyolite
552261	7.19504e+06	68.5278	235.777	Rhyolite
553245	7.19479e+06	89	228.698	Rhyolite
553004	7.19458e+06	50.1883	241.43	Rhyolite
552206	7.19489e+06	34.5791	265.67	Rhyolite
553156	7.19501e+06	59.797	278.111	Rhyolite
553005	7.19494e+06	79.0624	89.1065	Rhyolite
552258	7.19504e+06	70.0465	186.091	Rhyolite
552630	7.19513e+06	74.5114	36.6543	Rhyolite
553383	7.19475e+06	19.7727	257.543	Rhyolite
553087	7.19462e+06	70.9329	202.131	Rhyolite
553244	7.19479e+06	63.0118	205.017	Rhyolite
552639	7.19499e+06	68.4913	5.85067	Rhyolite
553482	7.19511e+06	69.9806	241.958	Rhyolite
553227	7.19474e+06	68.5896	347.422	Rhyolite
553243	7.19478e+06	32.4747	176.572	Rhyolite
552967	7.1946e+06	66.0511	112.754	Rhyolite
552657	7.19471e+06	20.7095	206.642	Rhyolite
552596	7.19505e+06	18.9883	213.308	Rhyolite
553145	7.19477e+06	71.5213	221.648	Rhyolite
553010	7.19493e+06	75.4036	187.463	Rhyolite
553036	7.19496e+06	87.5505	212.17	Rhyolite
552627	7.19511e+06	24.5085	217.575	Rhyolite
553008	7.19494e+06	78.2385	88.8575	Rhyolite
552647	7.19523e+06	59.3904	177.057	Rhyolite
552597	7.19505e+06	24.9515	203.352	Rhyolite
552143	7.19514e+06	16.9921	250.925	Rhyolite
552356	7.19504e+06	28.2634	225.653	Rhyolite
552952	7.19461e+06	78.7559	40.3681	Rhyolite
553006	7.19495e+06	56.8324	195.268	Rhyolite
553241	7.19479e+06	74.885	228.192	Rhyolite
552639	7.19499e+06	82.1578	7.14562	Rhyolite
553325	7.1946e+06	88.1938	22.8367	Rhyolite
553326	7.1946e+06	88.643	355.258	Rhyolite
553132	7.19501e+06	54.5728	241.226	Rhyolite
552639	7.19499e+06	66.3862	7.22028	Rhyolite
552262	7.19504e+06	75.4399	237.686	Rhyolite
552639	7.19499e+06	79.6766	170.622	Rhyolite
552627	7.19511e+06	21.7963	212.78	Rhyolite
552628	7.19511e+06	19.6865	203.844	Rhyolite
553087	7.19462e+06	71.3217	204.299	Rhyolite
553482	7.19511e+06	67.6934	235.145	Rhyolite
552999	7.19457e+06	72.5047	273.358	Rhyolite
553227	7.19474e+06	64.2798	352.714	Rhyolite
552639	7.19499e+06	69.8459	350.841	Rhyolite
552592	7.19505e+06	18.1928	225.025	Rhyolite
553145	7.19477e+06	83.49	233.716	Rhyolite
553001	7.19457e+06	53.4765	267.868	Rhyolite
553036	7.19496e+06	83.1134	199.241	Rhyolite
552632	7.19513e+06	68.4195	36.0772	Rhyolite
553244	7.19479e+06	70.3394	234.139	Rhyolite
553157	7.19478e+06	66.9349	210.052	Rhyolite
553169	7.19464e+06	67.6559	312.561	Rhyolite
552596	7.19505e+06	16.569	212.596	Rhyolite
553005	7.19457e+06	59.8389	248.505	Rhyolite
553382	7.19475e+06	11.437	258.881	Rhyolite
552351	7.19504e+06	33.6672	234.605	Rhyolite
552597	7.19505e+06	15.007	231	Rhyolite
553175	7.19464e+06	70.1375	303.931	Rhyolite
552142	7.19514e+06	18.0904	273.108	Rhyolite
553133	7.195e+06	47.8933	311.627	Rhyolite
552638	7.19514e+06	28.2539	217.242	Rhyolite
552639	7.19499e+06	54.3146	151.967	Rhyolite
553383	7.19475e+06	15.8849	239.13	Rhyolite
552206	7.19489e+06	25.7303	271.707	Rhyolite
552629	7.19512e+06	12.4124	57.9056	Rhyolite
552142	7.19514e+06	10.6153	248.21	Rhyolite
553087	7.19462e+06	73.0602	197.74	Rhyolite
553009	7.19495e+06	70.2281	200.184	Rhyolite
552638	7.19514e+06	29.477	210.219	Rhyolite
552997	7.19456e+06	85.7614	277.638	Rhyolite
552710	7.19468e+06	73.576	9.15765	Rhyolite
553319	7.1946e+06	79.7935	358.086	Rhyolite
553004	7.19458e+06	69.3048	255.858	Rhyolite
552136	7.19513e+06	14.5493	271.536	Rhyolite
553243	7.19478e+06	39.8417	155.267	Rhyolite
553010	7.19493e+06	70.4896	184.776	Rhyolite
553325	7.1946e+06	84.6695	1.90851	Rhyolite
553128	7.195e+06	52.8126	327.799	Rhyolite
552136	7.19513e+06	67.8921	6.71451	Rhyolite
552356	7.19504e+06	27.6569	224.041	Rhyolite
552136	7.19513e+06	75.9757	14.7089	Rhyolite
552657	7.19471e+06	19.4417	213.367	Rhyolite
552656	7.19522e+06	69.4781	211.554	Rhyolite
553790	7.19487e+06	53.8229	285.112	Rhyolite
554051	7.19493e+06	87.8394	327.555	Rhyolite
554012	7.1949e+06	70.0351	357.688	Rhyolite
553503	7.19532e+06	87.0628	182.505	Rhyolite
553685	7.19527e+06	40.4063	202.601	Rhyolite
553772	7.19485e+06	45.6541	42.583	Rhyolite
553891	7.19524e+06	79.3525	279.452	Rhyolite
553793	7.19487e+06	62.326	356.84	Rhyolite
553791	7.19487e+06	65.3907	341.562	Rhyolite
553503	7.19532e+06	84.3573	11.9086	Rhyolite
553791	7.19487e+06	62.229	348.79	Rhyolite
553700	7.1949e+06	67.4419	225.758	Rhyolite
553791	7.19487e+06	66.2126	337.983	Rhyolite
553998	7.19497e+06	64.2028	234.781	Rhyolite
553696	7.1949e+06	64.704	228.778	Rhyolite
553638	7.19535e+06	83.871	32.8117	Rhyolite
553770	7.19485e+06	45.3087	15.9463	Rhyolite
554008	7.19489e+06	81.7991	240.364	Rhyolite
553775	7.19485e+06	76.1187	220.272	Rhyolite
553758	7.19485e+06	58.6523	31.409	Rhyolite
553885	7.19489e+06	72.1646	281.082	Rhyolite
553885	7.19489e+06	72.408	269.299	Rhyolite
554000	7.19496e+06	76.1982	233.906	Rhyolite
553757	7.19485e+06	55.3949	54.3131	Rhyolite
553771	7.19485e+06	44.6138	30.3446	Rhyolite
553883	7.19489e+06	56.5408	133.446	Rhyolite
554052	7.19494e+06	86.5301	309.387	Rhyolite
553697	7.1949e+06	64.6049	96.5978	Rhyolite
553771	7.19485e+06	41.0772	42.2792	Rhyolite
553889	7.19524e+06	80.6092	104.91	Rhyolite
553685	7.19527e+06	22.0047	188.68	Rhyolite
554052	7.19494e+06	88.1415	146.251	Rhyolite
554006	7.19489e+06	77.1804	228.409	Rhyolite
553795	7.19488e+06	45.9147	296.96	Rhyolite
553793	7.19488e+06	51.7887	269.06	Rhyolite
553505	7.19532e+06	82.9355	328.49	Rhyolite
553637	7.19535e+06	82.2475	30.9811	Rhyolite
553996	7.19497e+06	61.4751	243.112	Rhyolite
553886	7.19489e+06	62.2973	127.576	Rhyolite
553891	7.19524e+06	82.6027	283.949	Rhyolite
553794	7.19487e+06	75.6128	336.817	Rhyolite
553885	7.19489e+06	75.705	282.337	Rhyolite
553503	7.19532e+06	86.235	341.432	Rhyolite
553503	7.19532e+06	89	201.438	Rhyolite
553770	7.19485e+06	45.9539	41.792	Rhyolite
553996	7.19497e+06	58.8499	241.89	Rhyolite
554017	7.1949e+06	70.3305	305.53	Rhyolite
553794	7.19488e+06	37.3866	289.239	Rhyolite
554017	7.1949e+06	69.2895	308.545	Rhyolite
554017	7.1949e+06	76.7076	298.304	Rhyolite
553441	7.19483e+06	39.6379	34.6347	Rhyolite
553998	7.19497e+06	56.7792	238.348	Rhyolite
554051	7.19493e+06	81.3017	142.409	Rhyolite
553888	7.19489e+06	61.378	123.289	Rhyolite
553885	7.19489e+06	76.5277	291.156	Rhyolite
553438	7.19481e+06	60.0657	13.1056	Rhyolite
554015	7.1949e+06	72.5448	317.093	Rhyolite
554008	7.19489e+06	79.7952	245.844	Rhyolite
553684	7.19527e+06	19.0493	181.858	Rhyolite
554009	7.19489e+06	69.347	216.21	Rhyolite
553637	7.19535e+06	81.2685	54.0189	Rhyolite
553441	7.19483e+06	37.7735	25.5022	Rhyolite
553889	7.19524e+06	85.7307	129.767	Rhyolite
553471	7.19516e+06	59.7887	11.4747	Rhyolite
553998	7.19497e+06	63.8392	217.386	Rhyolite
553760	7.19485e+06	57.8371	15.9554	Rhyolite
553700	7.1949e+06	72.3962	232.531	Rhyolite
553998	7.19497e+06	52.7172	261.791	Rhyolite
553883	7.19489e+06	61.7282	132.165	Rhyolite
553684	7.19527e+06	36.7134	208.689	Rhyolite
553792	7.19487e+06	52.0586	287.908	Rhyolite
553889	7.19524e+06	89	278.41	Rhyolite
